# Supplementary material for: Reducing Hinge Flexibility of CAR-T Cells Prolongs Survival In Vivo With Low Cytokines Release
Source: PubMed Central journal article supplement (PMC8524077; doi:10.3389/fimmu.2021.724211), 2021-10-05
Supplement: DataSheet_1.pdf [file DataSheet_1.pdf]

A. the nucleotide sequence of wild CD8 $\alpha$  hinge

ACCACTACCCCAGCACCGAGGCCACCCACCCCGGCTCCTACCATCGCCT  
CCCAGCCTCTGTCCCTGCGTCCGGAGGCATGTAGACCCGCAGCTGCCG  
TGCATACCCGGGGTCTTGACTTCGCCTGCGATATCTACATTTGGGCCCT  
CTGGCTGGTACTTGCGGGGTCTGCTGCTTTCACTCGTGATCACTCTTTA  
CTGT

B. the nucleotide sequence of CD8 $\alpha$ -GG hinge

ACCACTACCCCAGCACCGAGGCCACCCACCCCGGCTCCTACCATCGCCT  
CCCAGCCTCTGTCCCTGCGTCCGGAGGCATGTAGACCCGCAGCTGGTG  
GGGCCGTGCATACCCGGGGTCTTGACTTCGCCTGCGAT

Nucleotide sequence of the wild-type CD8 $\alpha$  hinge region was shown in A and the CD8 $\alpha$ -GG was shown in B.
