# Supplementary material for: Reducing Hinge Flexibility of CAR-T Cells Prolongs Survival In Vivo With Low Cytokines Release
Source: PubMed Central journal article supplement (PMC8524077; doi:10.3389/fimmu.2021.724211), 2021-10-05
Supplement: DataSheet_2.pdf [file DataSheet_2.pdf]

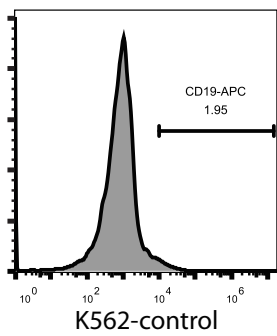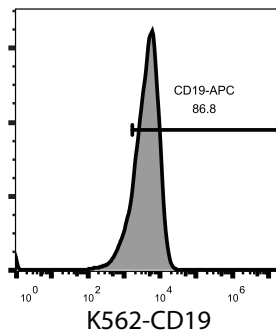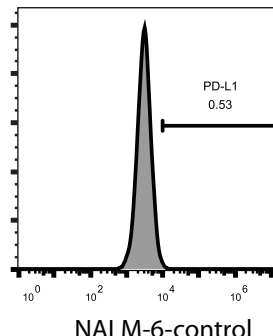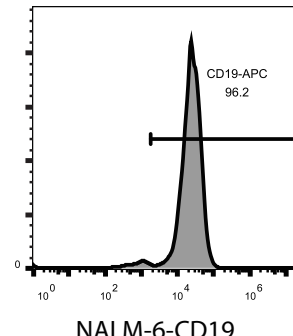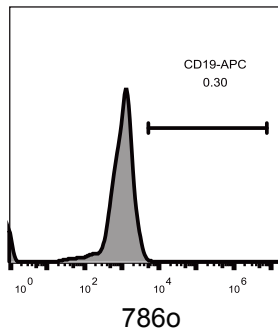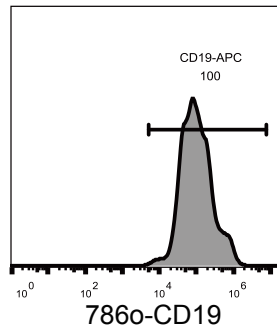

The figure shows the CD19 expression efficiency of overexpression CD19 gene modified K562, 786o and natural NALM-6 cell line.
